# Supplementary material
Source: Elsevier journal article supplement (https://www.sciencedirect.com/science/article/pii/S0034935616300871)
Supplement: mmc1 [file S0034935616300871:mmc1.pdf]

## ANEXOS

### Anexo 1.- Argumentos utilizados por miembros del panel que no estuvieron de acuerdo con alguna de las recomendaciones

| Recomendación                                                                                                                                                                                                                                                                                                                                                                                                                                                                                                                                                              | Argumento                                                                                                                                                                                                                                                                                                                                                                                                                                                                                                                                                      |
|----------------------------------------------------------------------------------------------------------------------------------------------------------------------------------------------------------------------------------------------------------------------------------------------------------------------------------------------------------------------------------------------------------------------------------------------------------------------------------------------------------------------------------------------------------------------------|----------------------------------------------------------------------------------------------------------------------------------------------------------------------------------------------------------------------------------------------------------------------------------------------------------------------------------------------------------------------------------------------------------------------------------------------------------------------------------------------------------------------------------------------------------------|
| <p><b>P01 Circunstancias que comprometen la seguridad en entornos fuera de quirófano.</b></p> <p>La seguridad de realizar sedaciones para procedimientos fuera del área quirúrgica puede verse comprometida por múltiples factores entre los que cabe destacar:</p> <p>Entorno de trabajo no cotidiano</p> <p>Técnicas complejas novedosas.</p> <p>Uso de medicación potencialmente peligrosa</p> <p>Complicaciones potenciales</p>                                                                                                                                        | <p>Los puntos en que se basa la afirmación, si bien fueron ciertos al iniciarse este tipo de procedimientos, hoy están completamente sobrepasados. El entorno es cotidiano (con un mínimo de presencias semanal/mensual), las técnicas son de sobra conocidas, la medicación no es distinta de habitual de sedación/anestesia, y las complicaciones son esperables en su mayoría</p>                                                                                                                                                                           |
| <p><b>P02 Definición de niveles de sedación</b></p> <p>El estado de sedación debe considerarse como un continuo que oscila desde planos muy superficiales hasta planos próximos a la pérdida de reflejos que se asemejan mucho a la anestesia general, siendo característico que pueda pasar con facilidad de un plano a otro en un mismo paciente, sobre todo con las asociaciones de fármacos. Teniendo en cuenta esta afirmación, a efectos de unificar criterio, usaremos las definiciones de niveles de sedación adaptadas de las publicadas por la ASA(Tabla 3).</p> | <p>Son muchos los procedimientos radiológicos intervencionistas realizados bajo sedación/analgesia profunda precisamente para que no haya respuesta al estímulo doloroso, y donde el paciente mantiene la respiración espontánea no siendo frecuente la ventilación asistida. En mi opinión es más real que en sedación/analgesia profunda la respuesta al estímulo sea sin respuesta al estímulo doloroso y que se defina anestesia general como la necesidad de ventilación asistida ya sea por indicación o como complicación de otro nivel de sedación</p> |
| <p><b>P2 Consentimiento Informado</b></p> <p><i>Debe obtenerse un consentimiento específico para la sedación diferente del de la técnica diagnóstica o terapéutica.</i></p>                                                                                                                                                                                                                                                                                                                                                                                                | <p>En mi opinión debería existir un consentimiento informado único que contemplara los riesgos de la técnica y de la sedación</p>                                                                                                                                                                                                                                                                                                                                                                                                                              |
| <p><b>P4 Medicación crónica y manejo preoperatorio</b></p> <p><i>El responsable de realizar la sedación debe decidir qué medicación puede suspenderse, o por el contrario no debe dejar de ser administrada y plantear posibles alternativas farmacológicas si las hubiere.</i></p>                                                                                                                                                                                                                                                                                        | <p>Esto obliga a que todos los pacientes tengan que pasar por una consulta previa de anestesia, sitúa que dependiendo del procedimiento puede gestionarse de otra forma más dinámica. La existencia de protocolos puede solventar desde mi punto de vista este punto.</p> <p>Redactaría el enunciado de manera distinta, ya que puede ser el responsable de realizar la sedación o su análogo en el mismo servicio en caso de que las valoraciones previas a la sedación las haga otra persona con las mismas competencias.</p>                                |
| <p><b>P6 Ventilación pulmonar:</b></p> <p><i>Se debe monitorizar la ventilación mediante observación de los movimientos del tórax, auscultación o capnografía.</i></p>                                                                                                                                                                                                                                                                                                                                                                                                     | <p>Añadiría impedancia torácica como exigencia hacia el monitor hemodinámico.</p> <p>La monitorización de la ventilación en procedimientos bajo sedación ha de ser mandatorio. En mi opinión es importante objetivar el estado ventilatorio con monitores y no confiar en la observación o valoración subjetiva. Además del capnógrafo es fácil disponer de monitor de los movimientos respiratorios registrado con los</p>                                                                                                                                    |

|                                                                                                                                                                                                                                                                                                                                                                                                                                                          |                                                                                                                                                                                                                                                                                                                                                                                                                                                                                                                                                                                                                                                                                                                                                                                                                                                                                                                      |  |
|----------------------------------------------------------------------------------------------------------------------------------------------------------------------------------------------------------------------------------------------------------------------------------------------------------------------------------------------------------------------------------------------------------------------------------------------------------|----------------------------------------------------------------------------------------------------------------------------------------------------------------------------------------------------------------------------------------------------------------------------------------------------------------------------------------------------------------------------------------------------------------------------------------------------------------------------------------------------------------------------------------------------------------------------------------------------------------------------------------------------------------------------------------------------------------------------------------------------------------------------------------------------------------------------------------------------------------------------------------------------------------------|--|
|                                                                                                                                                                                                                                                                                                                                                                                                                                                          | electrodos del ECG o con cinturones toraco-abdominales (RMN) usados para sincronizar las secuencias de RMN a la respiración y que muestran un registro en onda que permite no solo conocer la FR sino también estimar la regularidad y VC de la ventilación                                                                                                                                                                                                                                                                                                                                                                                                                                                                                                                                                                                                                                                          |  |
| <b>P8 Constantes hemodinámicas:</b><br><i>Durante la sedación debe mantenerse la vigilancia clínica de la situación hemodinámica y/o monitorizarse la frecuencia cardíaca de manera continua y la tensión arterial de manera intermitente.</i>                                                                                                                                                                                                           | <p>Añadiría trazado ECG debido a que la FC sola proviene de la pulsoximetría y mayor parte de las veces no es suficiente.</p> <p>Monitorización de frecuencia cardíaca siempre. De tensión arterial según estado del paciente, tipo de prueba, tiempo de sedación, tipo de sedación.</p>                                                                                                                                                                                                                                                                                                                                                                                                                                                                                                                                                                                                                             |  |
| <b>P10</b> <i>Los ítems del mismo a incluir pueden variar en función del procedimiento y del grado de sedación. El diseño del registro se adaptará a las necesidades de la unidad. Es fundamental la normalización del registro en cada organización para que facilite el análisis de complicaciones.</i>                                                                                                                                                | El diseño del registro es preferible que sea uniforme, para poder realizar análisis comparativos de diferentes técnicas y áreas.                                                                                                                                                                                                                                                                                                                                                                                                                                                                                                                                                                                                                                                                                                                                                                                     |  |
| <b>P12 Listado de Verificación de Procedimiento</b><br><i>Se deberá realizar una verificación de los puntos críticos del procedimiento diagnóstico o terapéutico por parte de todos los miembros del equipo según una adaptación del Listado de Verificación Quirúrgica de la Organización Mundial de la Salud (OMS)</i>                                                                                                                                 | <p>Debido a la movilidad del material y las diferentes características de los espacios se tiene que crear check list de</p> <ol style="list-style-type: none"> <li>1. espacio - comprobar suministros de O2 y otros gases medicinales y extracción</li> <li>2. equipamiento - presencia y carga de baterías, funcionamiento y consumibles</li> <li>3. Equipo de RCP</li> <li>4. Material y medicación</li> </ol> <p>El Check list puede ser largo pero debido a las específicas del almacenamiento es necesario ser detallado</p> <p>El listado es para cirugía, lo importante es que esté ADAPTADO al entorno fuera de quirófano, algo que no se ha hecho y debería existir.</p>                                                                                                                                                                                                                                    |  |
| <b>P13 Medios humanos:</b><br><i>Deberá existir personal sanitario responsable de la administración y monitorización del nivel de ansiolisis con cualificación y capacitación acreditada en la resucitación cardiopulmonar avanzada y en el manejo de los fármacos más usuales en la sedación. Este personal estará dedicado exclusivamente a la vigilancia del paciente y será independiente del personal encargado de la realización de la prueba.</i> | <p>En la ansiolisis dada las repercusiones fisiológicas que tiene, y los fármacos que se administran, no parece coste/beneficio que justifique un profesional específico para la vigilancia. Si los profesionales implicados deben de tener cierta formación en farmacología y RCP.</p> <p>En sedación mínima o ansiolisis en mi opinión puede no existir un facultativo específicamente para vigilarla. Sería aconsejable pero no imprescindible.</p> <p>En este caso el personal dedicado a la sedación no es necesario que lo sea en exclusiva. Los fármacos y sus dosis serán adecuados para conseguir dicho efecto de ansiolisis. Cualquier sanitario debe estar capacitado para ello. Supuesto tenga la formación suficiente (incluida en RCP).</p> <p>La sedación mínima puede ser realizada por cualquier médico, incluido el que realiza la técnica diagnóstico-terapéutica, delegando la vigilancia en</p> |  |

|                                                                                                                                                                                                                                                                                                                                                                                                                                                                                                                                                                                                                                                                                                                |                                                                                                                                                                                                                                                                                                                                                                                                                                                                                                                                                                                                                                                                                                                                                                                                                                                                                                                                                |  |
|----------------------------------------------------------------------------------------------------------------------------------------------------------------------------------------------------------------------------------------------------------------------------------------------------------------------------------------------------------------------------------------------------------------------------------------------------------------------------------------------------------------------------------------------------------------------------------------------------------------------------------------------------------------------------------------------------------------|------------------------------------------------------------------------------------------------------------------------------------------------------------------------------------------------------------------------------------------------------------------------------------------------------------------------------------------------------------------------------------------------------------------------------------------------------------------------------------------------------------------------------------------------------------------------------------------------------------------------------------------------------------------------------------------------------------------------------------------------------------------------------------------------------------------------------------------------------------------------------------------------------------------------------------------------|--|
|                                                                                                                                                                                                                                                                                                                                                                                                                                                                                                                                                                                                                                                                                                                | <p>personal sanitario auxiliar</p> <p>Para sedación mínima o ansiolisis creo que es suficiente formación en Soporte Vital Básico no en Soporte Vital Avanzado que incluye desfibrilación manual, indicación de fármacos de reanimación, etc.</p>                                                                                                                                                                                                                                                                                                                                                                                                                                                                                                                                                                                                                                                                                               |  |
| <p><b>P14 Medios materiales:</b></p> <p><i>Deberá estar disponible en la misma sala el material necesario para una reanimación básica de una depresión respiratoria así como los fármacos necesarios para la sedación y sus antagonistas*.</i></p>                                                                                                                                                                                                                                                                                                                                                                                                                                                             | <p>Incluiría algún dispositivo de vía aérea difícil si el despistaré previo de una posible vía aérea difícil no implica la derivación a otro entorno mas seguro.</p>                                                                                                                                                                                                                                                                                                                                                                                                                                                                                                                                                                                                                                                                                                                                                                           |  |
| <p><b>P15 Medios Humanos:</b></p> <p><i>Deberá existir un médico responsable de la administración y monitorización del nivel de sedación con cualificación y capacitación acreditada en la resucitación cardiopulmonar avanzada y en el manejo de los fármacos más usuales en la sedación. Este personal estará dedicado exclusivamente a la sedación del paciente y será independiente del personal encargado de la realización de la prueba.</i></p>                                                                                                                                                                                                                                                         | <p>Creo que el responsable directo puede no ser médico sino un profesional cualificado y capacitado bajo supervisión de un médico también cualificado y capacitado. El resto de las condiciones igual.</p> <p>El profesional medico, anestesiólogo, pudiera delegar en enfermería especializada en pacientes de bajo riesgo, y coordinar la actuación de varias salas (anexas). Si el procedimiento es en espacios donde sólo hay un gabinete si sería preciso la presencia del especialista para dicho grado de sedación. No considero lo mismo trabajar en áreas de endoscopia digestiva donde pueden funcionar más de dos salas a la par que en radiodiagnóstico con una sala única.</p> <p>Como para sedación ligera, es suficiente personal sanitario que conozca los efectos clínicos y adversos de los fármacos y las técnicas de RCO, pero al ser consciente no tiene necesariamente que ser independiente del que hace la técnica</p> |  |
| <p><b>P16 Medios materiales:</b></p> <p><i>Además de lo referido en el caso de la sedación mínima, la sala deberá contar con monitor o monitores que permitan registrar electrocardiografía, pulsioximetría, presión arterial no invasiva. Aparte, dada la continuidad de los estados de sedación, es recomendable la monitorización de capnografía*.</i></p>                                                                                                                                                                                                                                                                                                                                                  | <p>De acuerdo en todo excepto en la monitorización de la capnografía.</p> <p>Creo que ha de ser obligatorio y no recomendable un monitor de la ventilación con registro de onda (no valor de FR solo). Este monitor puede ser capnógrafo o registro de la respiración a partir de ECG o cinturón toraco-abdominal.</p>                                                                                                                                                                                                                                                                                                                                                                                                                                                                                                                                                                                                                         |  |
| <p><b>P17 Medios humanos:</b></p> <p><i>Deberá existir un médico responsable de la administración y monitorización del nivel de sedación con cualificación y capacitación acreditada en la resucitación cardiopulmonar avanzada y en el manejo de los fármacos más usuales en la sedación. Este personal estará dedicado exclusivamente a la sedación del paciente y será independiente del personal encargado de la realización de la prueba.</i></p> <p><i>Deberá existir personal sanitario encargado de asistir al médico dedicado a la sedación con cualificación y capacitación acreditada en la resucitación cardiopulmonar avanzada y en el manejo de los fármacos más usuales en la sedación.</i></p> | <p>Debido al limite entre sedación profunda y anestesia general debería ser un anestesiólogo quien realice esta técnica</p> <p>El profesional medico, anestesiólogo, pudiera delegar en enfermería especializada en pacientes de bajo riesgo, y coordinar la actuación de varias salas (anexas). Si el procedimiento es en espacios donde sólo hay un gabinete si sería preciso la presencia del especialista con dedicación exclusiva, para dicho grado de sedación. No considero lo mismo trabajar en áreas de endoscopia digestiva donde pueden funcionar más de dos salas a la par que en radiodiagnostico con una sala única.</p> <p>Entendiendo como médico responsable no necesariamente el hecho de administrar personalmente la sedación, que también podría</p>                                                                                                                                                                      |  |

|                                                                                                                                                                                                                                                                                                                                                                                                                                                                                                     |                                                                                                                                                                                                                                                                                                                                                                                                                                                                                                                                                                                                                                                                                                        |  |
|-----------------------------------------------------------------------------------------------------------------------------------------------------------------------------------------------------------------------------------------------------------------------------------------------------------------------------------------------------------------------------------------------------------------------------------------------------------------------------------------------------|--------------------------------------------------------------------------------------------------------------------------------------------------------------------------------------------------------------------------------------------------------------------------------------------------------------------------------------------------------------------------------------------------------------------------------------------------------------------------------------------------------------------------------------------------------------------------------------------------------------------------------------------------------------------------------------------------------|--|
|                                                                                                                                                                                                                                                                                                                                                                                                                                                                                                     | administrar personal sanitario a su cargo                                                                                                                                                                                                                                                                                                                                                                                                                                                                                                                                                                                                                                                              |  |
| <b>P18 Medios Materiales:</b><br><i>Deberá estar disponible en la misma sala el material necesario para el manejo avanzado de la vía aérea y ventilación artificial, los fármacos necesarios para la sedación, sus antagonistas y una monitorización que permita el seguimiento y registro de constantes vitales y respiratorias*.</i>                                                                                                                                                              | <p>Excepto para capnografía. La máquina de anestesia podría ser opcional.</p> <p>Dado que consideramos la profundidad de la sedación variable vería recomendable incluir al menos un dispositivo de vía aérea difícil en el resto de entornos para otras sedaciones distintas de la profunda.</p>                                                                                                                                                                                                                                                                                                                                                                                                      |  |
| <b>P19 Medios Humanos y Materiales:</b><br><i>Deberán ser los mismos que para la sedación profunda.</i>                                                                                                                                                                                                                                                                                                                                                                                             | Si estoy de acuerdo si quienes se plantean como médicos en la sedación profunda son de manera exclusiva anestesiólogos.                                                                                                                                                                                                                                                                                                                                                                                                                                                                                                                                                                                |  |
| <b>P20 Área de Recuperación</b><br><i>Todo paciente sometido a un procedimiento bajo sedación, debe ser trasladado a un área de recuperación atendida por profesionales cualificados y capacitados donde se garantice el cuidado hasta la recuperación de sus reflejos protectores y se evidencie la ausencia de complicaciones, bien para ser trasladado a una sala de hospitalización o bien para ser dado de alta a su domicilio.</i>                                                            | La recuperación la mayor parte de las veces se puede realizar en la misma sala. Esto se relaciona especialmente con la sedación consciente. el traslado es cuestión de prisa que de necesidad                                                                                                                                                                                                                                                                                                                                                                                                                                                                                                          |  |
| <b>P26</b> <i>Para dar un alta domiciliaria de manera segura sin la presencia del facultativo es recomendable contar con un sistema de puntuación clínico sencillo y reproducible.</i>                                                                                                                                                                                                                                                                                                              | El facultativo debería estar al tanto y asegurarse de que el paciente puede irse de Alta.                                                                                                                                                                                                                                                                                                                                                                                                                                                                                                                                                                                                              |  |
| <b>P27 Ingreso tras sedación fuera de quirófano</b><br><i>Las áreas que realicen procedimientos diagnósticos o terapéuticos bajo sedación deben tener acceso a cama hospitalaria para disponer de la misma en caso de complicaciones técnicas o de imposibilidad de garantizar el alta hospitalaria con total seguridad.</i>                                                                                                                                                                        | <p>determinaría como capacidad de traslado inmediato</p> <p>Camas o áreas específicas para resolver estas situaciones</p> <p>Como alternativa a tener camas, deben tener organizado un traslado con todas las medidas de seguridad si alguien requiere ingreso.</p>                                                                                                                                                                                                                                                                                                                                                                                                                                    |  |
| <b>P30</b> <i>Entre los obligados se consideran 2 grupos:</i><br><i>Indicadores de actividad</i><br><i>Tasa de sedaciones para procedimientos fuera de quirófano:</i><br><i>Tasa de de sedaciones ligeras-moderadas fuera de quirófano</i><br><i>Tasa de sedaciones profundas fuera de quirófano</i><br><i>Tasa de sedaciones para procedimientos fuera de quirófano atendidos por anestesiólogos</i><br><br><i>Indicadores de resultados</i><br><i>Tasa de casos cancelados por discomfort del</i> | <p>A la hora del registro, diferenciar entre sedaciones ligeras-moderadas y profundas será muy difícil de realizar; no creo que sea una tasa útil. Yo pondría la tasa de sedaciones realizadas por No anestesiólogos. En cuanto a tasas de resultado, identificar a las sedaciones ligeras-moderadas que hayan requerido soporte respiratorio será muy complejo de hacer y habría que definir muy claramente que es soporte respiratorio.</p> <p>Tasa de pacientes con ingreso o reingreso no previsto por causa anestésica</p> <p>Un indicador debe de ser fácil de registrar y medir. La tasa de sedaciones según niveles pueden ser difíciles de medir, por lo que igual debiera simplificarse.</p> |  |

|                                                                                                                                                                                                                                                                                                                                            |                                                                                                          |  |
|--------------------------------------------------------------------------------------------------------------------------------------------------------------------------------------------------------------------------------------------------------------------------------------------------------------------------------------------|----------------------------------------------------------------------------------------------------------|--|
| <p><i>paciente</i></p> <p><i>Tasa de casos de sedaciones profunda no prevista</i></p> <p><i>Tasa de sedaciones ligera-moderada que requieren soporte respiratorio</i></p> <p><i>Tasa de pacientes que presentan un evento adverso severo (CR, anafilaxia, etc)</i></p> <p><i>Tasa de pacientes con ingreso o reingreso no previsto</i></p> | <p>La tasa de resultados estoy de acuerdo.</p> <p>calidad y seguridad no son actividad y resultados;</p> |  |
|--------------------------------------------------------------------------------------------------------------------------------------------------------------------------------------------------------------------------------------------------------------------------------------------------------------------------------------------|----------------------------------------------------------------------------------------------------------|--|

## Anexo 2.- Situaciones que pueden aumentar el riesgo de complicaciones anestésicas

|                                                        |                                                                                                                                                                                                                                                                                                                                                                                                                                                                                                                 |
|--------------------------------------------------------|-----------------------------------------------------------------------------------------------------------------------------------------------------------------------------------------------------------------------------------------------------------------------------------------------------------------------------------------------------------------------------------------------------------------------------------------------------------------------------------------------------------------|
| <b>Situaciones o pacientes de alto riesgo</b>          | <p>Ancianos pluripatológicos (ASA &gt; III)</p> <p>Incapacidad de cooperación (demencia, retraso mental)</p> <p>RGE severo o alto riesgo de RGE</p> <p>Ortopnea</p> <p>Disminución del nivel de conciencia y/o reflejos protectores de la vía aérea</p> <p>Infección respiratoria</p> <p>Apnea del sueño</p> <p>Patología cardiovascular grave conocida</p> <p>Obesidad mórbida</p> <p>Procesos que limiten el acceso a la vía aérea</p> <p>Procedimientos que se prevean largos, muy dolorosos o complejos</p> |
| <b>Aumenta el riesgo de inestabilidad hemodinámica</b> | <p>Ancianos con poca reserva cardiovascular</p> <p>Deshidratación secundaria a la preparación intestinal</p> <p>Alteraciones hidroelectrolíticas, sobre todo, hipopotasemia</p> <p>Respuesta vagal por distensión intestinal y fármacos vagolíticos</p> <p>Cirrosis hepática</p>                                                                                                                                                                                                                                |
| <b>Riesgo de broncoaspiración</b>                      | <p>Preparación intestinal si no se respeta tiempo de ayuno</p> <p>Procedimientos que impliquen instilación de líquido a nivel gástrico</p> <p>Hemorragias digestivas altas</p> <p>Oclusión intestinal</p> <p>Acalasia</p>                                                                                                                                                                                                                                                                                       |
| <b>Dificultad de acceso a la vía aérea</b>             | <p>Acceso compartido en endoscopia alta y/o fibrobroncopia</p> <p>Posición del paciente: decúbito lateral o prono</p>                                                                                                                                                                                                                                                                                                                                                                                           |

Elaboración propia a partir de (20-24)

### **Anexo 3. Escala de Ramsay**

---

|   |                                          |
|---|------------------------------------------|
| 1 | Agitado                                  |
| 2 | Despierto, tranquilo y colaborador       |
| 3 | Adormecido, responde a estímulo verbal   |
| 4 | Adormecido, responde a estímulo táctil   |
| 5 | Adormecido, responde a estímulo doloroso |
| 6 | No responde a estímulos                  |

---

Adaptada de (<sup>29</sup>)

#### **Anexo 4. Escala de evaluación de alerta/sedación (OAAS)**

| <b>NIVEL</b> | <b>SIGNOS CLÍNICOS</b>                                     | <b>PUNTUACION</b> |
|--------------|------------------------------------------------------------|-------------------|
| <b>1</b>     | Paciente agitado                                           | <b>6</b>          |
| <b>2</b>     | Respuesta rápida a llamada en tono normal                  | <b>5</b>          |
| <b>3</b>     | Respuesta letárgica a llamada en tono normal               | <b>4</b>          |
| <b>4</b>     | Respuesta sólo ante repetición o voz elevada               | <b>3</b>          |
| <b>5</b>     | Respuesta letárgica tras agitarle o empujarle con suavidad | <b>2</b>          |
| <b>6</b>     | No respuesta tras agitarle suavemente                      | <b>1</b>          |
| <b>7</b>     | No respuesta a estímulos fuertes                           | <b>0</b>          |

Adaptada de (<sup>30</sup>)

## Anexo 5. Escala Aldrete

| ACTIVIDAD                                                                      | PUNTOS |
|--------------------------------------------------------------------------------|--------|
| Capacidad para mover las cuatro extremidades voluntariamente o a requerimiento | 2      |
| Capacidad para mover las dos extremidades voluntariamente o a requerimiento    | 1      |
| Incapacidad para mover las extremidades voluntariamente o a requerimiento      | 0      |
| <br>RESPIRACIÓN                                                                |        |
| Capacidad para inspirar aire profundamente y para toser libremente             | 2      |
| Disnea o respiración limitada                                                  | 1      |
| Apnea                                                                          | 0      |
| <br>CIRCULACIÓN                                                                |        |
| Presión arterial $\pm$ 20 % del nivel preanestésico                            | 2      |
| Presión arterial $\pm$ 20-49 % del nivel preanestésico                         | 1      |
| Presión arterial $\pm$ 50 % del nivel preanestésico                            | 0      |
| <br>NIVEL DE CONCIENCIA                                                        |        |
| Plenamente consciente                                                          | 2      |
| Despierta a la llamada                                                         | 1      |
| Sin respuesta                                                                  | 0      |
| <br>SATURACIÓN OXIGENO*                                                        |        |
| Mantenimiento saturación de O <sub>2</sub> > 92 % con aire ambiente            | 2      |
| Necesidad de administrar O <sub>2</sub> para mantener la saturación > 90 %     | 1      |
| Saturación de O <sub>2</sub> < 90 % incluso con O <sub>2</sub> suplementario   | 0      |

Adaptada de (<sup>31</sup>)



## Anexo 6. Escala Modifiel Postanesthesia Discharge Scoring System (MPADSS)

| CONSTANTES VITALES                                                            | PUNTOS |
|-------------------------------------------------------------------------------|--------|
| <b>CIRCULATORIO</b>                                                           |        |
| Presión arterial y frecuencia del pulso en un 20 % del valor preoperatorio    | 2      |
| Presión arterial y frecuencia del pulso en un 20-40 % del valor preoperatorio | 1      |
| Presión arterial y frecuencia del pulso en un > 40 % del valor preoperatorio  | 0      |
| <b>NIVEL DE ACTIVIDAD</b>                                                     |        |
| Marcha constante sin mareos                                                   | 2      |
| Requiere ayuda                                                                | 1      |
| Incapacidad para caminar                                                      | 0      |
| <b>NÁUSEAS Y VÓMITOS</b>                                                      |        |
| Mínimas, tratamiento adecuado con la medicación oral                          | 2      |
| Moderadas, tratamiento adecuado con la medicación intramuscular               | 1      |
| Intensas, sin respuesta al tratamiento repetido                               | 0      |
| <b>HEMORRAGIA QUIRÚRGICA</b>                                                  |        |
| <i>Mínima</i>                                                                 | 2      |
| Moderada                                                                      | 1      |
| Intensa                                                                       | 0      |
| <b>DOLOR</b>                                                                  |        |
| Mínimo                                                                        | 2      |
| Moderado                                                                      | 1      |
| Severo o intenso                                                              | 0      |

Los pacientes con puntuación de 9 se consideran idóneos para recibir el alta hospitalaria. Adaptada de <sup>(32)</sup>

## Anexo 7. Escala De Aldrete Modificado

|                                                              |   |
|--------------------------------------------------------------|---|
| Tensión arterial $\pm 20\%$ del nivel preanestésico          | 2 |
| Tensión arterial $\pm 20\%$ a $49\%$ del nivel preanestésico | 1 |
| Tensión arterial $\pm 50\%$ del nivel preanestésico          | 0 |
| Es capaz de respirar profundamente y toser                   | 2 |
| Disnea que limita la respiración o taquipnea                 | 1 |
| Apnea o ventilación mecánica                                 | 0 |
| Paciente totalmente despierto                                | 2 |
| Paciente despierta a la llamada                              | 1 |
| Paciente no responde                                         | 0 |
| SO <sub>2</sub> >92% en aire                                 | 2 |
| Necesita O <sub>2</sub> para SO <sub>2</sub> >90%            | 1 |
| SO <sub>2</sub> < 90% aún con O <sub>2</sub> suplementario   | 0 |
| Capaz de mover las 4 extremidades                            | 2 |
| Capaz de mover 2 extremidades                                | 1 |
| No es capaz de mover extremidades                            | 0 |
| Tolerancia a líquidos                                        | 2 |
| Nauseas                                                      | 1 |
| Náusea ni vómitos                                            | 0 |
| Sin dolor                                                    | 2 |
| Dolor controlable con analgesia oral.                        | 1 |
| Dolor severo que requiere fármacos parenterales              | 0 |
| Apósitos secos y sin secreción                               | 2 |
| Mojado pero sin aumento de la secreción                      | 1 |
| Area marcada de secreción                                    | 0 |

|                                                 |   |
|-------------------------------------------------|---|
| Capaz de levantarse y caminar en línea recta    | 2 |
| Presenta vértigo al levantarse                  | 1 |
| Mareo al levantarse                             | 0 |
| Micción espontánea                              | 2 |
| Incapaz de eliminar pero se muestra confortable | 1 |
| Incapaz de eliminar y molesto por ello          | 0 |

---

Adaptada de (<sup>33</sup>)

## ANEXO 8

| Indicadores de calidad y seguridad                                                                                                                                                                                                                                                                                                                                                                                                                                                                                                                                                                                                                                                                                                                                                                                                                                                                                                                                                                                                                                                                                                                                                                                                                                                                                                                                                                                                                                                                                                                                                                                                                                                                                                                                                                                                                                                                                                                                                                                                                                                                     |
|--------------------------------------------------------------------------------------------------------------------------------------------------------------------------------------------------------------------------------------------------------------------------------------------------------------------------------------------------------------------------------------------------------------------------------------------------------------------------------------------------------------------------------------------------------------------------------------------------------------------------------------------------------------------------------------------------------------------------------------------------------------------------------------------------------------------------------------------------------------------------------------------------------------------------------------------------------------------------------------------------------------------------------------------------------------------------------------------------------------------------------------------------------------------------------------------------------------------------------------------------------------------------------------------------------------------------------------------------------------------------------------------------------------------------------------------------------------------------------------------------------------------------------------------------------------------------------------------------------------------------------------------------------------------------------------------------------------------------------------------------------------------------------------------------------------------------------------------------------------------------------------------------------------------------------------------------------------------------------------------------------------------------------------------------------------------------------------------------------|
| <p><b>Indicadores de actividad</b></p> <p>Tasa de sedaciones para procedimientos fuera de quirófano:</p> $\frac{N^{\circ} \text{ total de sedaciones fuera de quirófano} \times 100}{N^{\circ} \text{ total de sedaciones realizadas en el hospital}}$ <p>Tasa de de sedaciones ligeras-moderadas fuera de quirófano</p> $\frac{N^{\circ} \text{ total de sedaciones fuera de quirófano niveles ansiolisis – sedación moderada} \times 100}{N^{\circ} \text{ total de sedaciones fuera de quirófano}}$ <p>Tasa de sedaciones profundas fuera de quirófano</p> $\frac{N^{\circ} \text{ total de sedaciones fuera de quirófano nivel sedación profunda y anestesia general} \times 100}{N^{\circ} \text{ total de sedaciones fuera de quirófano}}$ <p>Tasa de sedaciones para procedimientos fuera de quirófano atendidos por anestesiólogos</p> $\frac{N^{\circ} \text{ total de sedaciones fuera de quirófano atendidas por anestesiólogos} \times 100}{N^{\circ} \text{ total de sedaciones fuera de quirófano}}$ <p><b>Indicadores de resultados</b></p> <p>Tasa de casos cancelados por discomfort del paciente</p> $\frac{N^{\circ} \text{ total de sedaciones fuera de quirófano canceladas} \times 100}{N^{\circ} \text{ total de sedaciones fuera de quirófano}}$ <p>Tasa de casos de sedaciones profunda no prevista</p> $\frac{N^{\circ} \text{ total de sedaciones fuera de quirófano con sedación profunda no prevista} \times 100}{N^{\circ} \text{ total de sedaciones fuera de quirófano}}$ <p>Tasa de sedaciones ligera-moderada que requieren soporte respiratorio</p> $\frac{N^{\circ} \text{ total de sedaciones fuera de quirófano que requieren soporte respiratorio no prevista} \times 100}{N^{\circ} \text{ total de sedaciones fuera de quirófano}}$ <p>Tasa de pacientes que presentan un evento adverso severo (CR, anafilaxia, etc)</p> $\frac{N^{\circ} \text{ total de sedaciones fuera de quirófano que presentan un evento adverso} \times 100}{N^{\circ} \text{ total de sedaciones fuera de quirófano}}$ <p>Tasa de pacientes con ingreso o reingreso no previsto</p> |

$$\frac{N^{\circ} \text{ total de sedaciones fuera de quirófano que requieren ingreso no previsto} \times 100}{N^{\circ} \text{ total de sedaciones fuera de quirófano}}$$

#### **Indicadores opcionales**

Entre los elementos **opcionales** figuran los siguientes:

- Duración del procedimiento.
- Medicaciones usadas: dosis y tiempos.
- Tiempo desde la sedación al alta del paciente.
- Satisfacción del paciente: al alta y a las 48 hs.
- Satisfacción de los profesionales implicados: médicos y enfermeras.
